# Supplementary material
Source: Springer Nature journal article supplement (https://www.springermedizin.de/resource/supplementary/13054_2014_2900_MOESM1_ESM.pdf/9714470)
Supplement: MOESM1 [file 9714470]

Patient sticker

Date (mm/dd/yyyy) : \_\_/\_\_/2012 OBSERVER NAME: \_\_\_\_\_

Time (hh:mm) : \_\_ : \_\_ AM PM

Type of procedure  turning of the side for cleaning  repositioning

mobilization PT/OT  other:.....

**BPS  
At rest  
(before  
procedure)**

**BPS  
max.value  
during  
procedure**

**BPS  
At rest  
(10 min after  
procedure)**

|                                                             |                                                                                                                                                                                                                                                                    |  |  |
|-------------------------------------------------------------|--------------------------------------------------------------------------------------------------------------------------------------------------------------------------------------------------------------------------------------------------------------------|--|--|
| <b>1. Facial expression<br/>(1-4) =</b>                     |                                                                                                                                                                                                                                                                    |  |  |
|                                                             | <p><i>1 Relaxed</i><br/> <i>2 Partially tightened (brow lowering)</i><br/> <i>3 Fully tightened (eyelid closing)</i><br/> <i>4 Grimacing (folded cheek)</i></p>                                                                                                    |  |  |
| <b>2. Movement<br/>of upper<br/>limbs (1-4) =</b>           |                                                                                                                                                                                                                                                                    |  |  |
| <i>At rest: check tonus<br/>by mobilization of the limb</i> | <p><i>1 No movement</i><br/> <i>2 Partially bent</i><br/> <i>3 Very bent with finger flexion</i><br/> <i>4 Retracted, opposition to care</i></p>                                                                                                                   |  |  |
| <b>3.a.<br/>Compliance with<br/>ventilation (1-4) =</b>     |                                                                                                                                                                                                                                                                    |  |  |
| <i>OR</i>                                                   | <p><i>1 Tolerating ventilation</i><br/> <i>2 Coughing but tolerating ventilation most of the time</i><br/> <i>3 Fighting ventilator but ventilation possible sometimes</i><br/> <i>4 Unable to control ventilation</i></p>                                         |  |  |
| <b>3.b.<br/>Vocalization (1-4) =</b>                        |                                                                                                                                                                                                                                                                    |  |  |
| <i>(non intubated patient)</i>                              | <p><i>1 No pain vocalization</i><br/> <i>2 Moaning not frequent and not prolonged (&lt;3 sec ou 3/min)</i><br/> <i>3 Moaning frequent or prolonged (&gt;3 sec ou 3/min)</i><br/> <i>4 Howling or verbal complaints including « ow, ouch» or breath-holding</i></p> |  |  |

Patient sticker

Date (mm/dd/yyyy) : \_\_/\_\_/2012      OBSERVER NAME: \_\_\_\_\_

Time (hh:mm) : \_\_ : \_\_ AM PM

Type of procedure  turning of the side for cleaning  repositioning  
 mobilization PT/OT  other:.....

**CPOT  
At rest  
(before  
procedure)**

**CPOT  
max.value  
during  
procedure**

**CPOT  
At rest  
(10 min after  
procedure)**

**1. Facial  
expressions  
(0-2) =**

- 0 Relaxed, neutral* : No muscle tension observed  
*1 Tense* : Presence of frowning, brow lowering, orbit tightening and levator contraction or any other change (e.g. opening eyes or earing during nociceptive procedures)  
*2 Grimacing* : All previous facial movements plus eyelid tightly closed : the patient may present with mouth open or biting the endotracheal tube

**2. Body  
movements  
(0-2) =**

- 0 Absence of movement or normal position* : Does not move at all (doesn't necessarily mean absence of pain) or normal position (movements not aimed toward the pain site or not made for the purpose of protection)  
*1 Protection* : Slow, cautious movements, touching or rubbing the pain site, seeking attention through movements  
*2 Restlessness* : Pulling tube, attempting to sit up, moving limbs/thrashing, not following commands, striking at staff, trying to climb out of bed

**3.a.  
Compliance with  
the ventilator  
(0-2) =**

OR

- 0 Tolerating ventilator or movement*: Alarms not activated, easy ventilation  
*1 Coughing but tolerating*: Coughing, alarms may be activated but stop spontaneously  
*2 Fighting ventilator*: Asynchrony: blocking ventilation, alarms frequently activated

**3.b.  
Vocalization  
(0-2) =  
(non intubated  
patient)**

- 0 Talking in normal tone or no sound*: Talking in normal tone or no sound  
*1 Sighing, moaning*: Sighing, moaning  
*2 Crying out, sobbing*: Crying out, sobbing

**4. Muscle tension  
(0-2)**

Evaluation by passive flexion and extension of upper limbs when patient is at rest or evaluation when patient is being turned

- 0 Relaxed*: No resistance to passive movements  
*1 Tense, rigid*: Resistance to passive movements  
*2 Very tense or rigid*: Strong resistance to passive movements, incapacity to complete them

Patient sticker

Date (mm/dd/yyyy) : \_\_/\_\_/2012      OBSERVER NAME: \_\_\_\_\_

Time (hh:mm) : \_\_ : \_\_ AM PM

Type of procedure  turning of the side for cleaning  repositioning  
 mobilization PT/OT  other:.....

**NVPS  
At rest  
(before  
procedure)**

**NVPS  
max.value  
during  
procedure**

**NVPS  
At rest  
(10 min after  
procedure)**

**1. Face  
(0-2) =**

0 No particular expression or smile  
1 Occasional grimace, tearing, frown or wrinkled forehead  
2 Frequent grimace, tearing, frown or wrinkled forehead

**2. Activity  
(movement)  
(0-2) =**

0 Lying quietly, normal position  
1 Seeking attention through movement of slow cautious movements  
2 Restless activity and/or withdrawal reflexes

**3 Guarding  
(0-2) =**

0 Lying quietly, no positioning of hands over areas of body  
1 Splinting areas of the body, tense  
2 Rigid, stiff

**4 Physiologic I  
(vital signs)  
(0-2) =**

0 Stable vital signs, no change in past 4 hours  
1 Change over past 4 hours in any of the following: SBP >20   HR >20   RR >10  
2 Change over past 4 hours in any of the following: SBP >30   HR >25   RR >20

**5.a Respiratory  
(0-2)**

0 Baseline RR/Spo2 Complaint with ventilator  
1 RR >10 above baseline or 5% ↓ Spo2 Mild asynchrony with ventilator  
2 RR >20 above baseline or 10% ↓ Spo2 Severe asynchrony with ventilator

**5.b Physiologic II  
(0-2) =**

0 Warm, dry skin  
1 Dilated pupils, perspiring, flushing  
2 Diaphoretic, pallor
